# Supplementary material for: Nasal Microbiota Modifies the Effects of Particulate Air Pollution on Plasma Extracellular Vesicles
Source: PubMed Central journal article supplement (PMC7013854; doi:10.3390/ijerph17020611), 2020-01-17
Supplement: ijerph-17-00611-s001.pdf [file ijerph-17-00611-s001.pdf]

**Table S1:** Association between PM exposure and different classes of EV, stratifying subjects by their *Moraxella* genus relative abundance into Mor- ( $\leq 25\%$ ) and Mor+ ( $> 25\%$ ) group. All the multivariable linear regression models were adjusted for age, gender, smoking behavior (Never smoker, Former smoker, Current smoker), and BMI.

|                                                          |                      | MOR-<br>(n = 30) |             |          | MOR+<br>(n = 10) |                |          | <i>p</i> for interaction |  |
|----------------------------------------------------------|----------------------|------------------|-------------|----------|------------------|----------------|----------|--------------------------|--|
|                                                          |                      | GMR              | (95% CI)    | <i>p</i> | GMR              | (95% CI)       | <i>p</i> |                          |  |
| <b>PM<sub>2.5</sub> exposure</b>                         |                      |                  |             |          |                  |                |          |                          |  |
| <b>EV count<sup>A</sup></b><br>(10 <sup>6</sup> /ml PL)  | Total EV             | 1.92             | (1.12-3.30) | 0.02     | 0.78             | (0.40-1.52)    | 0.36     | 0.05                     |  |
|                                                          | Exosomes             | 1.11             | (0.35-3.54) | 0.85     | 0.14             | (0.001-7.458)  | 0.26     | 0.02                     |  |
| <b>EV subtypes<sup>B</sup></b> (10 <sup>3</sup> / ml PL) | CD61+ (platelets)    | 2.98             | (0.51-17.3) | 0.21     | 0.81             | (0.004-183)    | 0.92     | 0.58                     |  |
|                                                          | CD66+ (neutrophils)  | 2.63             | (0.51-13.5) | 0.23     | 0.004            | (0.001-0.14)   | 0.01     | 0.17                     |  |
|                                                          | EpCAM+ (epithelium)  | 2.68             | (0.91-7.93) | 0.07     | 0.005            | (0.001-0.11)   | 0.01     | 0.10                     |  |
|                                                          | CD105+ (endothelium) | 4.39             | (1.27-15.1) | 0.02     | 0.1              | (0.002-4.30)   | 0.17     | 0.47                     |  |
|                                                          | CD14+ (macr./monoc.) | 5.34             | (1.09-26.1) | 0.04     | 0.04             | (0.003-0.49)   | 0.02     | 0.24                     |  |
| <b>PM<sub>10</sub> exposure</b>                          |                      |                  |             |          |                  |                |          |                          |  |
| <b>EV count<sup>A</sup></b><br>(10 <sup>6</sup> /ml PL)  | Total EV             | 1.94             | (1.09-3.43) | 0.02     | 0.81             | (0.37-1.74)    | 0.49     | 0.04                     |  |
|                                                          | Exosomes             | 1.23             | (0.36-4.12) | 0.73     | 0.1              | (0.001-7.45)   | 0.21     | 0.02                     |  |
| <b>EV subtypes<sup>B</sup></b> (10 <sup>3</sup> / ml PL) | CD61+ (platelets)    | 3.54             | (0.57-22.1) | 0.17     | 0.48             | (0.001-164.7)  | 0.75     | 0.78                     |  |
|                                                          | CD66+ (neutrophils)  | 2.89             | (0.53-15.9) | 0.21     | 0.002            | (0.00007-0.05) | 0.01     | 0.10                     |  |
|                                                          | EpCAM+ (epithelium)  | 3.27             | (1.08-9.91) | 0.04     | 0.003            | (0.00009-0.11) | 0.01     | 0.04                     |  |
|                                                          | CD105+ (endothelium) | 5.38             | (1.51-19.1) | 0.01     | 0.06             | (0.001-2.71)   | 0.11     | 0.26                     |  |
|                                                          | CD14+ (macr./monoc.) | 5.42             | (1.02-28.9) | 0.05     | 0.02             | (0.003-8.83)   | 0.01     | 0.16                     |  |

GMR, Geometric Mean Ratio

<sup>A</sup> Counts of EV fractions obtained by Nanosight analysis

<sup>B</sup> Counts of EV fractions obtained by Flow-cytometry
